# Supplementary material for: Population Genomic Structure and Genome-Wide Linkage Disequilibrium in Farmed Atlantic Salmon (Salmo salar L.) Using Dense SNP Genotypes
Source: PubMed Central journal article supplement (PMC6302115; doi:10.3389/fgene.2018.00649), 2018-12-14

Supplementary Figure 1. Inferred population structure of samples using the program STRUCTURE

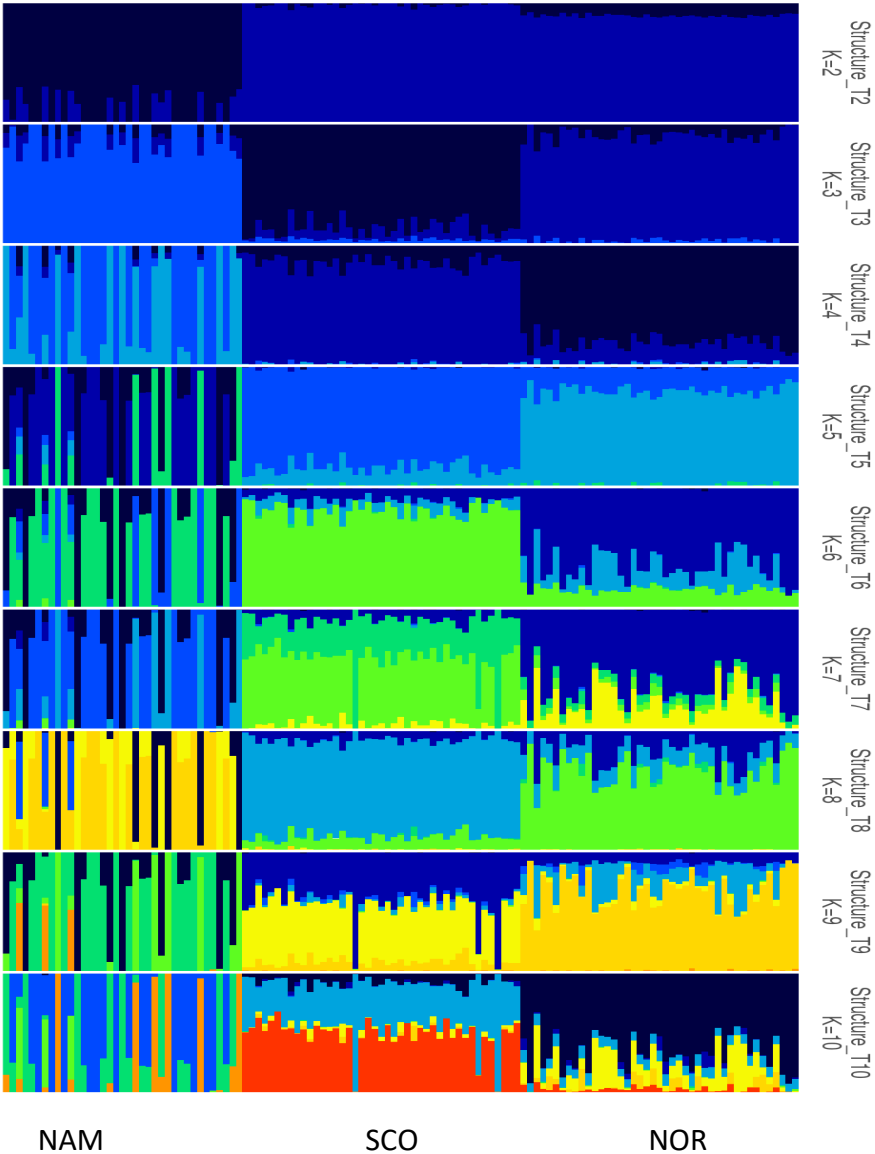

Supplement: Image_1.pdf [file Image_1.pdf]
